# Supplementary material for: A facile biliquid-interface co-assembly synthesis of mesoporous vesicles with large pore sizes
Source: Royal Society of Chemistry journal article supplement (doi:10.1039/c5ce02592c), 2016-01-01
Supplement: c5ce02592c1.pdf [file c5ce02592c1.pdf]

## Electronic Supplementary information

### **A Facile Biliquid-Interface Co-assembly Synthesis of Mesoporous**

### **Vesicles with Large Pore Sizes**

Yu Zhang<sup>a</sup>, Qin Yue<sup>a</sup>, Yongjian Jiang<sup>\*b</sup>, Wei Luo<sup>\*c</sup>, Ahmed A. Elzatahry<sup>d</sup>, Abdulaziz Alghamdi<sup>e</sup>, Yonghui Deng<sup>\*a,f</sup> and Dongyuan Zhao<sup>a</sup>

<sup>a</sup>Department of Chemistry, State Key Laboratory of Molecular Engineering of Polymers, and Shanghai Key Laboratory of Molecular Catalysis and Innovative Materials, State Key Laboratory of ASIC & System, Collaborative Innovation Center of Chemistry for Energy Materials, Fudan University, Shanghai 200433, P. R. China. Email: yhdeng@fudan.edu.cn

<sup>b</sup>Department of Pancreatic Surgery, Huashan Hospital, Fudan University, Shanghai, China. Email: yongjianjiang@fudan.edu.cn

<sup>c</sup>State Key Laboratory for Modification of Chemical Fibers and Polymer Materials, College of Materials Science and Engineering, Donghua University, Shanghai 201620, P. R. China. Email: wluo@dhu.edu.cn

<sup>d</sup>Materials Science and Technology Program, College of Arts and Sciences, Qatar University, PO Box 2713, Doha 2713, Qatar

<sup>e</sup>Department of Chemistry, College of Science, King Saud University, Riyadh 11451, Saudi Arabia

<sup>f</sup>State Key Lab of Transducer Technology, Shanghai Institute of Microsystem and Information Technology, Chinese Academy of Sciences, Shanghai 200050, P. R. China.

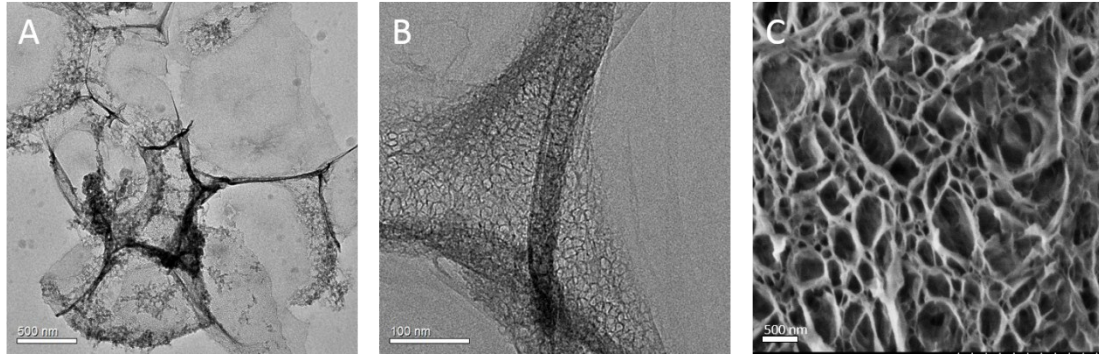

**Figure S1**, TEM (A, B) and FESEM (C) images of self-assembled porous foams with mesoporous silica framework by replacing the water with 0.3 mol/L  $\text{Na}_2\text{SO}_4$  aqueous solution while maintaining other conditions.
